# Supplementary material
Source: Springer Nature journal article supplement (https://www.springermedizin.de/resource/supplementary/12969_2014_1734_MOESM1_ESM.pdf/9590678)
Supplement: MOESM1 [file 9590678]

pGALS\*

Joint Contractures?

Pattern of joint involvement\*  
(upper > lower limbs) \*

Consider MPS \*

From Birth?\*

Evolving?

Consider Arthrogryposis or other genetic disorder

Weakness, myalgia, ↑ muscle enzymes?

Consider Poly/Dermatomyositis

Skin stiffness?\*\*\*

Consider Scleroderma

Obvious inflammation?  
(redness, swelling, effusion)

Consider Arthritis (JIA, RA)

Other evidence of inflammation?  
•Fever, ↑ ESR  
•Elevated ANA  
•Pain proportional to degree of stiffness  
•Responsive to NSAIDS

Urinary GAG analysis†

Test unavailable?

Elevated uGAG or abnormal pattern?

Any of the following?  
•Corneal clouding  
•Umbilical or inguinal hernia  
•Heart murmur  
•Carpal tunnel syndrome  
•Recurrent respiratory and/or ear infections

Consider MPS Disorder

IDUA or other enzyme assay(s)§
